# Supplementary material for: Multivariate optimization of optical properties of CdSe quantum dots obtained by a facile one-pot aqueous synthesis
Source: Royal Society of Chemistry journal article supplement (doi:10.1039/c9qi00105k), 2019-01-01
Supplement: c9qi00105k1.pdf [file c9qi00105k1.pdf]

Electronic Supplementary Information for:

**Multivariate optimization of optical properties of CdSe quantum dots obtained by  
a facile one-pot aqueous synthesis**

Isabelle Moraes Amorim Viegas, Beate Saegesser Santos, Adriana Fontes, Giovannia

Araujo de Lima Pereira\*, Claudete Fernandes Pereira\*

**Table S1** Experimental conditions and results of the syntheses from the two-level full factorial design, with stirring for 120 min.

| <b>MSA/Cd molar ratio</b> | <b>Cd/Se molar ratio</b> | <b>pH</b> | <b>Temperature (°C)</b> | <b>PL emission (a. u.)</b> |
|---------------------------|--------------------------|-----------|-------------------------|----------------------------|
| 2:1                       | 1:1                      | 5.0       | 30                      | 244                        |
| 6:1                       | 1:1                      | 5.0       | 30                      | 4                          |
| 2:1                       | 5:1                      | 5.0       | 30                      | 833                        |
| 6:1                       | 5:1                      | 5.0       | 30                      | 1622                       |
| 2:1                       | 1:1                      | 12.0      | 30                      | 127                        |
| 6:1                       | 1:1                      | 12.0      | 30                      | 0                          |
| 2:1                       | 5:1                      | 12.0      | 30                      | 780                        |
| 6:1                       | 5:1                      | 12.0      | 30                      | 19                         |
| 4:1                       | 3:1                      | 8.5       | 60                      | 3                          |
| 4:1                       | 3:1                      | 8.5       | 60                      | 4                          |
| 4:1                       | 3:1                      | 8.5       | 60                      | 1                          |
| 2:1                       | 1:1                      | 5.0       | 90                      | 7                          |
| 6:1                       | 1:1                      | 5.0       | 90                      | 0                          |
| 2:1                       | 5:1                      | 5.0       | 90                      | 11                         |
| 6:1                       | 5:1                      | 5.0       | 90                      | 921                        |
| 2:1                       | 1:1                      | 12.0      | 90                      | 2                          |
| 6:1                       | 1:1                      | 12.0      | 90                      | 0                          |
| 2:1                       | 5:1                      | 12.0      | 90                      | 6                          |
| 6:1                       | 5:1                      | 12.0      | 90                      | 1                          |

**Table S2** Effect estimates summary for the results of PL emission obtained from the two-level full factorial design.

| <b>Factor</b>         | <b>Effect</b> | <b>Standard error</b> | <b>-95% Confidence limit</b> | <b>+95% Confidence limit</b> |
|-----------------------|---------------|-----------------------|------------------------------|------------------------------|
| Mean/Intercept        | 241.32        | 0.35                  | 239.81                       | 242.82                       |
| (1)MSA/Cd molar ratio | 69.62         | 0.76                  | 66.34                        | 72.91                        |
| (2)Cd/Se molar ratio  | 476.12        | 0.76                  | 472.84                       | 479.41                       |
| (3)pH                 | -338.38       | 0.76                  | -341.66                      | -335.09                      |
| (4)Temperature        | -335.12       | 0.76                  | -338.41                      | -331.84                      |
| 1x2                   | 163.62        | 0.76                  | 160.34                       | 166.91                       |
| 1x3                   | -293.38       | 0.76                  | -296.66                      | -290.09                      |
| 1x4                   | 154.38        | 0.76                  | 151.09                       | 157.66                       |
| 2x3                   | -306.88       | 0.76                  | -310.16                      | -303.59                      |
| 2x4                   | -243.62       | 0.76                  | -246.91                      | -240.34                      |
| 3x4                   | 105.88        | 0.76                  | 102.59                       | 109.16                       |
| 1x2x3                 | -322.88       | 0.76                  | -326.16                      | -319.59                      |
| 1x2x4                 | 64.88         | 0.76                  | 61.59                        | 68.16                        |
| 1x3x4                 | 65.88         | 0.76                  | 62.59                        | 69.16                        |
| 2x3x4                 | 76.88         | 0.76                  | 73.59                        | 80.16                        |

**Table S3** Experimental conditions and results of the syntheses from the Doehlert design, with stirring for 60 min.

| <b>MSA/Cd molar ratio</b> | <b>Cd/Se molar ratio</b> | <b>pH</b> | <b>Temperature (°C)</b> | <b>PL emission (a. u.)</b> | <b><math>\lambda_{\text{abs}}</math> (nm)</b> | <b><math>\lambda_{\text{ems}}</math> (nm)</b> | <b>FWHM (nm)</b> |
|---------------------------|--------------------------|-----------|-------------------------|----------------------------|-----------------------------------------------|-----------------------------------------------|------------------|
| 5:1                       | 6:1                      | 4.0       | 30                      | 75                         | 452                                           | 595                                           | 146              |
| 5:1                       | 6:1                      | 6.0       | 30                      | 322                        | 456                                           | 587                                           | 143              |
| 6:1                       | 8:1                      | 5.0       | 30                      | 2725                       | 413                                           | 504                                           | 125              |
| 6:1                       | 6.5:1                    | 5.0       | 45                      | 2046                       | 416                                           | 511                                           | 127              |
| 5.1:1                     | 9.7:1                    | 4.8       | 25                      | 2518                       | 419                                           | 511                                           | 127              |
| 5.1:1                     | 9.7:1                    | 4.8       | 25                      | 2625                       | 418                                           | 511                                           | 126              |
| 5.1:1                     | 9.7:1                    | 4.8       | 25                      | 2543                       | 417                                           | 510                                           | 127              |
| 7:1                       | 4:1                      | 4.0       | 30                      | 77                         | 443                                           | 578                                           | 145              |
| 7:1                       | 4:1                      | 6.0       | 30                      | 113                        | 473                                           | 614                                           | 140              |
| 7:1                       | 5.5:1                    | 4.0       | 15                      | 124                        | 433                                           | 576                                           | 145              |
| 7:1                       | 5.5:1                    | 6.0       | 15                      | 464                        | 450                                           | 581                                           | 143              |
| 8:1                       | 6:1                      | 3.0       | 30                      | 0                          | 470                                           | -                                             | -                |
| 8:1                       | 6:1                      | 5.0       | 30                      | 2518                       | 415                                           | 507                                           | 125              |
| 8:1                       | 6:1                      | 5.0       | 30                      | 2241                       | 413                                           | 506                                           | 126              |
| 8:1                       | 6:1                      | 5.0       | 30                      | 2550                       | 414                                           | 505                                           | 124              |
| 8:1                       | 6:1                      | 7.0       | 30                      | 45                         | 486                                           | 617                                           | 142              |
| 8:1                       | 4.5:1                    | 5.0       | 45                      | 2114                       | 420                                           | 512                                           | 128              |
| 8:1                       | 7.5:1                    | 5.0       | 15                      | 1583                       | 418                                           | 513                                           | 127              |
| 9:1                       | 8:1                      | 4.0       | 30                      | 90                         | 432                                           | 574                                           | 147              |
| 9:1                       | 8:1                      | 6.0       | 30                      | 1356                       | 437                                           | 560                                           | 138              |
| 9:1                       | 6.5:1                    | 4.0       | 45                      | 88                         | 429                                           | 573                                           | 146              |
| 9:1                       | 6.5:1                    | 6.0       | 45                      | 715                        | 443                                           | 573                                           | 142              |
| 10:1                      | 4:1                      | 5.0       | 30                      | 2265                       | 418                                           | 511                                           | 126              |
| 10:1                      | 5.5:1                    | 5.0       | 15                      | 2184                       | 414                                           | 506                                           | 125              |
| 11:1                      | 6:1                      | 4.0       | 30                      | 65                         | 436                                           | 577                                           | 146              |
| 11:1                      | 6:1                      | 6.0       | 30                      | 856                        | 440                                           | 568                                           | 141              |
| 6:1                       | 8:1                      | 5.0       | 30                      | 2745*                      | 411*                                          | 503*                                          | 125*             |
| 6:1                       | 8:1                      | 5.0       | 30                      | 2789*                      | 410*                                          | 501*                                          | 125*             |

\*Replicates obtained under optimal conditions, after the statistical treatment of data, and therefore these results were not considered in the effect estimates and ANOVA calculations.

**Table S4** Optical features of CdSe QDs synthesized under different experimental conditions of the plateau area of response surfaces of Fig. 2.

| <b>Sample</b> | <b>MSA/Cd molar ratio</b> | <b>Cd/Se molar ratio</b> | <b>pH</b> | <b>Temperature (°C)</b> | <b>PL emission (a. u.)</b> | <b><math>\lambda_{\text{abs}}</math> (nm)</b> | <b><math>\lambda_{\text{ems}}</math> (nm)</b> | <b>FWHM (nm)</b> |
|---------------|---------------------------|--------------------------|-----------|-------------------------|----------------------------|-----------------------------------------------|-----------------------------------------------|------------------|
| A             | 6:1                       | 8:1                      | 5.0       | 30                      | 2725                       | 413                                           | 504                                           | 125              |
| B             | 6:1                       | 8:1                      | 5.0       | 30                      | 2745                       | 411                                           | 503                                           | 125              |
| C             | 6:1                       | 8:1                      | 5.0       | 30                      | 2789                       | 410                                           | 501                                           | 125              |
| D             | 8:1                       | 6:1                      | 5.0       | 30                      | 2518                       | 415                                           | 507                                           | 125              |
| E             | 8:1                       | 6:1                      | 5.0       | 30                      | 2241                       | 413                                           | 506                                           | 126              |
| F             | 8:1                       | 6:1                      | 5.0       | 30                      | 2550                       | 414                                           | 505                                           | 124              |
| G             | 10:1                      | 4:1                      | 5.0       | 30                      | 2265                       | 418                                           | 511                                           | 126              |

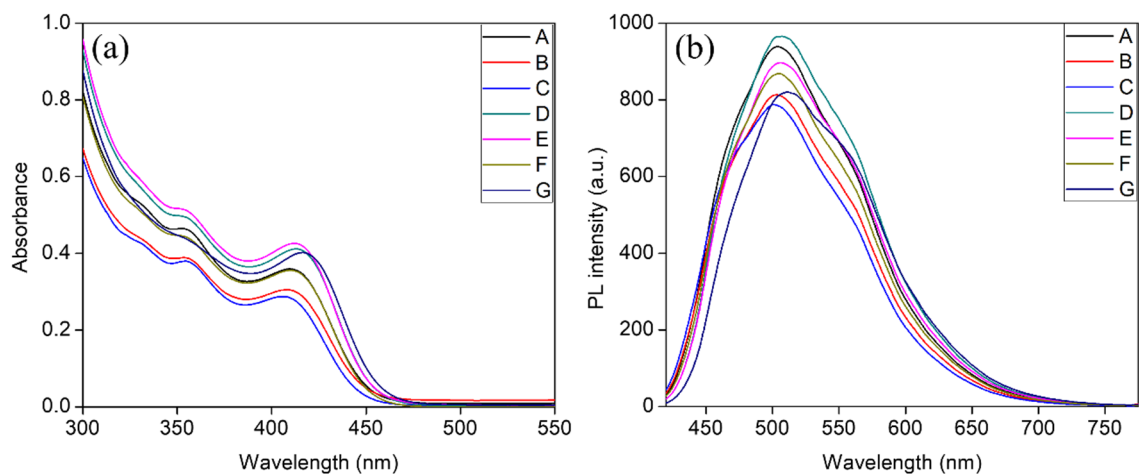

**Fig. S1** Absorption and PL emission spectra of suspensions of CdSe QDs synthesized under the experimental conditions specified in Table S4 and stirring for 60 min.

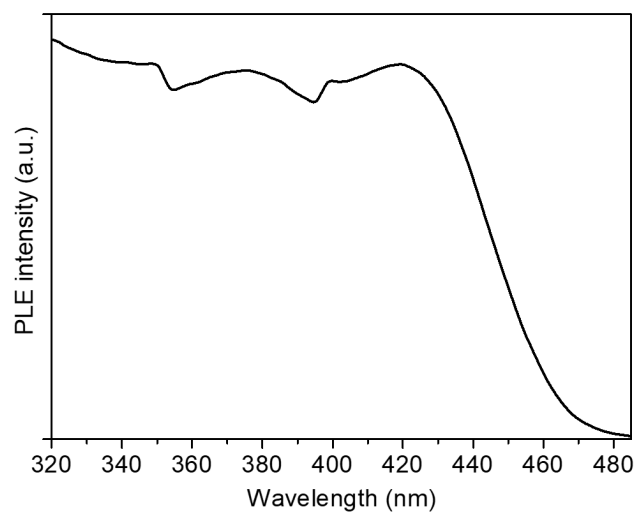

**Fig. S2** PL excitation spectra (at emission wavelength of 505 nm) of MSA-capped CdSe QDs synthesized at 30 °C and pH 5.0, with MSA/Cd and Cd/Se molar ratios of 6:1 and 8:1, respectively, and stirring for 60 min.
